# Supplementary material for: Behavioral, personality, and temperamental characteristics predict escalating alcohol and cannabis use and problems during the first-year of college
Source: Research Square preprint supplement (doi:10.21203/rs.3.rs-6157562/v1), 2025-04-24
Supplement: Supplementary file 1 [file 8e82cd0aa18ecf5731464767.docx]

| Supplemental Table 1. TLI indicators and standardized factor loadings | | | | | | |
| --- | --- | --- | --- | --- | --- | --- |
|  | **Prevalence** |  | **Factor Loadings** | | |
| Item Description |  |  | β | SE | p |
| 1.      In your entire life, have you ever had a time, lasting 2 weeks, when you didn't care about the things you usually care about, or you didn't enjoy what you usually enjoy? | 0.48 |  | 0.738 | 0.046 | <0.001 |
| 2.      Have you ever had a time that lasted for at least 2 years when your mood was low, sad, or depressed most of the day, more than half of the time? | 0.27 |  | 0.651 | 0.059 | <0.001 |
| 3.      Have you ever had a strong fear or avoidance of being in a crowd or standing in a line? | 0.32 |  | 0.485 | 0.066 | <0.001 |
| 4.      Most of the time throughout your life, regardless of the situation or whom you were with, have you avoided jobs or tasks that dealt with a lot of people? | 0.26 |  | 0.515 | 0.068 | <0.001 |
| 5.      Do you often have to keep an eye out to keep people from using you, hurting you, or lying to you? | 0.35 |  | 0.741 | 0.046 | <0.001 |
| 6.      Do you spend a lot of time wondering if you can trust your friends or the people you work with? | 0.30 |  | 0.712 | 0.052 | <0.001 |
| 7.      Do you find that it is best not to let other people know much about you because they will use it against you? | 0.30 |  | 0.695 | 0.055 | <0.001 |
| 8.      Do you often get angry or lash out when someone criticizes you in some way? | 0.18 |  | 0.482 | 0.078 | <0.001 |
| 9.      Did you ever have a time in your life when you lied a lot or any time you lied to keep from being hurt? | 0.35 |  | 0.664 | 0.048 | <0.001 |
| 10.   Did you ever have a time in your life when you lied a lot, NOT counting any times you lied to keep from being hurt? | 0.19 |  | 0.65 | 0.06 | <0.001 |
| 11.   Did you ever get more than 3 traffic tickets for reckless or careless driving, speeding, or causing an accident? | 0 |  | N/A*b* | N/A*b* | N/A*b* |
| 12.   Did you ever run away from home overnight at least twice when you were living at home, or run away and stay away for a longer time? | 0.04 |  | 0.688 | 0.104 | <0.001 |
| 13.   Did you ever destroy, break, or vandalize someone else’s property like their car, home, or other personal belongings? | 0.04 |  | 0.131 | 0.107 | 0.221 |
| 14.   Did you ever fail to pay off your debts- like moving to avoid paying rent, not making payments on a loan or mortgage, failing to make alimony or child support payments or filing for bankruptcy? | 0.01 |  | N/A*b* | N/A*b* | N/A*b* |
| 15.   Did you ever steal anything from someone or someplace when no one was around? | 0.19 |  | 0.573 | 0.069 | <0.001 |
| 16.   Did you ever shoplift? | 0.12 |  | 0.599 | 0.077 | <0.001 |
| 17.   Did you ever rob or mug someone or snatch a purse? | 0 |  | N/A*b* | N/A*b* | N/A*b* |
| 18.   Did you ever get into a lot of fights that you started? | 0.02 |  | 0.922 | 0.068 | <0.001 |
| 19.   Did you ever get into a fight that came to swapping blows with someone like a husband, wife, girlfriend, or boyfriend? | <0.01 |  | N/A*b* | N/A*b* | N/A*b* |
| 20.   Did you ever hit someone so hard that you injured them or they had to see a doctor? | 0.03 |  | 0.4 | 0.15 | 0.007 |
| 21.   Did you ever physically hurt another person in any other way on purpose? | 0.11 |  | 0.418 | 0.096 | <0.001 |
| 22.   Did you ever harass, threaten, or blackmail someone? | 0.03 |  | 0.879 | 0.077 | <0.001 |
| 23.   Did you ever make money illegally like selling stolen property, or selling drugs? | 0.02 |  | 0.69 | 0.14 | <0.001 |
| 24.   Did you ever use a weapon like a stick, knife, or gun in a fight? | 0 |  | N/A*b* | N/A*b* | N/A*b* |
| Table of factor loadings on latent trait using items with sufficient endorsement rates for analysis. Notations: *a*Transmissible Liability Index, *b*N/A - excluded from model due to low level of endorsement. See supplemental Table S1 for inter-item correlations where numbers 1 thru 24 correspond to items TLI_1 thru TLI_24; dropped items not shown. | | | | | |

| Supplemental Table S2. Inter-item correlations for TLI indicators | | | | | | | | | | | | | | | | | | |
| --- | --- | --- | --- | --- | --- | --- | --- | --- | --- | --- | --- | --- | --- | --- | --- | --- | --- | --- |
|  | TLI_1 | TLI_2 | TLI_3 | TLI_4 | TLI_5 | TLI_6 | TLI_7 | TLI_8 | TLI_9 | TLI_10 | TLI_12 | TLI_15 | TLI_16 | TLI_18 | TLI_20 | TLI_21 | TLI_22 | TLI_23 |
| TLI_1 | 1.000 |  |  |  |  |  |  |  |  |  |  |  |  |  |  |  |  |  |
| TLI_2 | 0.773 | 1.000 |  |  |  |  |  |  |  |  |  |  |  |  |  |  |  |  |
| TLI_3 | 0.423 | 0.381 | 1.000 |  |  |  |  |  |  |  |  |  |  |  |  |  |  |  |
| TLI_4 | 0.392 | 0.258 | 0.646 | 1.000 |  |  |  |  |  |  |  |  |  |  |  |  |  |  |
| TLI_5 | 0.471 | 0.391 | 0.380 | 0.376 | 1.000 |  |  |  |  |  |  |  |  |  |  |  |  |  |
| TLI_6 | 0.489 | 0.329 | 0.360 | 0.318 | 0.736 | 1.000 |  |  |  |  |  |  |  |  |  |  |  |  |
| TLI_7 | 0.429 | 0.222 | 0.272 | 0.398 | 0.594 | 0.722 | 1.000 |  |  |  |  |  |  |  |  |  |  |  |
| TLI_8 | 0.303 | 0.275 | 0.342 | 0.430 | 0.344 | 0.285 | 0.243 | 1.000 |  |  |  |  |  |  |  |  |  |  |
| TLI_9 | 0.440 | 0.248 | 0.274 | 0.356 | 0.475 | 0.341 | 0.573 | 0.454 | 1.000 |  |  |  |  |  |  |  |  |  |
| TLI_10 | 0.318 | 0.237 | 0.232 | 0.293 | 0.459 | 0.326 | 0.350 | 0.370 | 0.582 | 1.000 |  |  |  |  |  |  |  |  |
| TLI_12 | 0.546 | 0.616 | 0.267 | 0.135 | 0.431 | 0.288 | 0.295 | -0.004 | 0.534 | 0.618 | 1.000 |  |  |  |  |  |  |  |
| TLI_15 | 0.256 | 0.298 | -0.028 | 0.021 | 0.171 | 0.294 | 0.306 | 0.224 | 0.313 | 0.456 | 0.236 | 1.000 |  |  |  |  |  |  |
| TLI_16 | 0.238 | 0.404 | 0.115 | -0.020 | 0.315 | 0.100 | 0.281 | 0.152 | 0.310 | 0.553 | 0.272 | 0.786 | 1.000 |  |  |  |  |  |
| TLI_18 | 0.433 | 0.471 | 0.274 | 0.343 | 0.551 | 0.438 | 0.444 | 0.450 | 0.649 | 0.701 | 0.555 | 0.566 | 0.430 | 1.000 |  |  |  |  |
| TLI_20 | 0.158 | -0.029 | -0.086 | 0.140 | 0.301 | -0.066 | 0.095 | 0.255 | 0.297 | 0.372 | 0.522 | 0.080 | 0.013 | 0.400 | 1.000 |  |  |  |
| TLI_21 | 0.246 | 0.184 | -0.197 | 0.204 | 0.231 | 0.221 | 0.274 | 0.178 | 0.182 | 0.244 | 0.407 | 0.383 | 0.154 | 0.578 | 0.525 | 1.000 |  |  |
| TLI_22 | 0.523 | 0.483 | 0.212 | 0.175 | 0.508 | 0.121 | 0.348 | 0.505 | 0.633 | 0.583 | 0.725 | 0.487 | 0.426 | 0.905 | 0.544 | 0.637 | 1.000 |  |
| TLI_23 | 0.433 | 0.182 | 0.274 | 0.196 | 0.388 | 0.293 | 0.444 | 0.144 | 0.385 | 0.433 | 0.555 | 0.566 | 0.564 | 0.655 | 0.626 | 0.445 | 0.724 | 1.000 |
| Inter-item correlation matrix of TLI items that were included in the confirmatory factor analysis used to obtain the factor scores. Item numbers correspond to labels shown in Table 1 of the manuscript; absent numbers reflect items that were removed due to low levels of endorsement in the MAPme Study. | | | | | | | | | | | | | | | | | | |
